# Supplementary material
Source: publisher site journal article supplement (https://www.dovepress.com/get_supplementary_file.php?f=468235.xlsx)
Supplement: Supplementary file 1 [file get_supplementary_file.php]

## Sheet: Sheet1
Table S1 Training set and test set baseline information
Characteristics	Training set(n=1198)	Testing set(n=514)
Age (median [IQR])	63.00 [55.00, 70.00]	64.00 [56.00, 71.00]
Gender=1 (%)	895 (74.7)	384 (74.7)
Hypertension=1 (%)	658 (54.9)	288 (56.0)
Diabete=1(%)	302 (25.2)	132 (25.7)
Stroke=1 (%)	101 ( 8.4)	66 (12.8)
Smoking =1(%)	632 (52.8)	299 (58.2)
Anticoagulate=1 (%)	387 (32.3)	166 (32.3)
Diuretic=1 (%)	164 (13.7)	71 (13.8)
Left main stem=1 (%)	111 ( 9.3)	34 ( 6.6)
Left anterior descending branch=1 (%)	946 (79.0)	430 (83.7)
Left Circumflex branch=1 (%)	800 (66.8)	337 (65.6)
Right Circumflex branch=1(%)	831 (69.4)	358 (69.6)
Gensini score (median [IQR])	42.00 [24.00, 80.00]	44.00 [24.00, 80.00]
Number of brackets(median [IQR])	1.00 [1.00, 2.00]	2.00 [1.00, 2.00]
Leukocyte (median [IQR])	6.19 [5.13, 7.55]	6.18 [5.24, 7.62]
AISI (median [IQR])	172.83 [113.29, 302.39]	185.37 [117.59, 310.87]
PDW (median [IQR])	16.30 [16.10, 16.50]	16.30 [16.10, 16.50]
ALT (median [IQR])	23.00 [16.00, 33.00]	24.00 [16.00, 33.00]
AST (median [IQR])	24.00 [20.00, 33.00]	25.00 [20.00, 33.00]
TBIL (median [IQR])	12.50 [9.70, 16.20]	12.70 [9.70, 16.20]
Creatinine (median [IQR])	73.20 [61.62, 88.07]	75.95 [64.10, 88.40]
Glucose (median [IQR])	5.23 [4.61, 6.47]	5.22 [4.56, 6.49]
Uric acid (median [IQR])	346.45 [290.34, 411.28]	352.61 [292.92, 411.70]
Total cholesterol (median [IQR])	3.89 [3.26, 4.74]	3.88 [3.28, 4.70]
Triglyceride (median [IQR])	1.31 [0.96, 1.85]	1.32 [0.96, 1.82]
HDL (median [IQR])	1.04 [0.88, 1.19]	1.02 [0.86, 1.20]
LDL (median [IQR])	2.34 [1.85, 2.92]	2.29 [1.83, 2.89]
TSH (median [IQR])	2.25 [1.46, 3.54]	2.22 [1.40, 3.43]
Abbreviation: PDW, platelet distribution width; ALT, Glutathione aminotransferase; AST, glutathione transaminase; TBIL, total bilirubin; AISI, Aggregate Index of Systemic Inflammation; HDL, high density lipoprotein; LDL, low density lipoprotein; TSH, thyroid stimulating hormone
